# Role of an Iron-Dependent Transcriptional Regulator in the Pathogenesis and Host Response to Infection with *Streptococcus pneumoniae*

Radha Gupta<sup>1</sup>, Minny Bhatt<sup>2</sup>, Edwin Swiatlo<sup>1,3\*</sup>, Bindu Nanduri<sup>2</sup>

**1** Department of Microbiology, University of Mississippi Medical Center, Jackson, Mississippi, United States of America, **2** Department of Basic Sciences, College of Veterinary Medicine, Mississippi State University, Mississippi State, Mississippi, United States of America, **3** Department of Medicine, University of Mississippi Medical Center, Jackson, Mississippi, United States of America

## Abstract

Iron is a critical cofactor for many enzymes and is known to regulate gene expression in many bacterial pathogens. *Streptococcus pneumoniae* normally inhabits the upper respiratory mucosa but can also invade and replicate in lungs and blood. These anatomic sites vary considerably in both the quantity and form of available iron. The genome of serotype 4 pneumococcal strain TIGR4 encodes a putative iron-dependent transcriptional regulator (IDTR). A mutant deleted at *idtr* ( $\Delta idtr$ ) exhibited growth kinetics similar to parent strain TIGR4 in vitro and in mouse blood for up to 48 hours following infection. However,  $\Delta idtr$  was significantly attenuated in a murine model of sepsis. IDTR down-regulates the expression of ten characterized and putative virulence genes in nasopharyngeal colonization and pneumonia. The host cytokine response was significantly suppressed in sepsis with  $\Delta idtr$ . Since an exaggerated inflammatory response is associated with a poor prognosis in sepsis, the decreased inflammatory response could explain the increased survival with  $\Delta idtr$ . Our results suggest that IDTR, which is dispensable for pneumococcal growth in vitro, is associated with regulation of pneumococcal virulence in specific host environments. Additionally, IDTR ultimately modulates the host cytokine response and systemic inflammation that contributes to morbidity and mortality of invasive pneumococcal disease.

**Citation:** Gupta R, Bhatt M, Swiatlo E, Nanduri B (2013) Role of an Iron-Dependent Transcriptional Regulator in the Pathogenesis and Host Response to Infection with *Streptococcus pneumoniae*. PLoS ONE 8(2): e55157. doi:10.1371/journal.pone.0055157

**Editor:** Stefan Bereswill, Charité-University Medicine Berlin, Germany

**Received:** September 4, 2012; **Accepted:** December 27, 2012; **Published:** February 20, 2013

**Copyright:** © 2013 Gupta et al. This is an open-access article distributed under the terms of the Creative Commons Attribution License, which permits unrestricted use, distribution, and reproduction in any medium, provided the original author and source are credited.

**Funding:** This work was funded by the Mississippi INBRE grant from the National Institutes of Health. The funders had no role in study design, data collection and analysis, decision to publish, or preparation of the manuscript.

**Competing Interests:** The authors have declared that no competing interests exist.

\* E-mail: eswiatlo@umc.edu

## Introduction

The Gram-positive bacterium *Streptococcus pneumoniae* (pneumococcus) is an opportunistic human pathogen whose primary niche is the human nasopharynx. In susceptible individuals pneumococcus can invade other anatomic sites causing otitis media, pneumonia, bacteremia, and meningitis leading to significant morbidity and mortality [1]. The mechanisms of translocation of pneumococci from nasopharynx to sterile sites, and changes in its physiology to adapt to these different niches are still not clearly understood.

Several studies have shown that iron is an important nutrient required for pneumococcal growth and survival in vitro and in vivo [2–4]. Pneumococci can utilize various iron sources such as ferric and ferrous iron salts, hemoglobin, hemein, ferritin, and ferrioxamine [3–6]. The different anatomic sites of pneumococcal infection vary considerably in the quantity as well as the form of available iron sources. The nasopharynx is a markedly iron-restricted environment while blood has a comparatively high total iron level. Hemoglobin and ferritin are the main iron-containing molecules in the blood. Lactoferrin, transferrin, ferritin (released from cell turnover at mucosal surfaces) and possibly small amounts of hemoglobin and its breakdown products are potential iron sources in the respiratory tract. Xenosiderophores produced by nasopharyngeal commensals may be a source of iron for

pneumococci during nasopharyngeal colonization [3]. Since pneumococci can replicate in different host environments with varying iron availability it is likely that pneumococci sense changes in iron availability in the host environment and regulate gene expression in response. We hypothesize that iron is potentially an important environmental signal which regulates expression of genes required for pneumococcal survival and virulence in the host.

Iron-dependent regulators (IdeRs) are metal-activated DNA-binding proteins found in a wide variety of bacteria. These proteins are transcriptional regulators which bind to specific DNA sequences in the promoter regions of genes that they regulate in an iron-dependent manner. The classical ferric-uptake regulator (Fur) of *Escherichia coli* is a well-characterized, iron-responsive regulator which represses transcription of multiple operons in response to intracellular levels of iron [7]. Homologs of Fur have been identified in several Gram-negative pathogens such as *Vibrio*, *Pseudomonas*, *Yersinia*, and *Neisseria* [8–12]. The functional homolog of Fur in Gram-positive pathogens is represented by a family of metal-responsive transcriptional regulators whose prototype is the diphtheria toxin repressor protein (DtxR). DtxR homologs have been identified in other bacteria such as *Streptomyces* spp., *Staphylococcus epidermidis*, *Mycobacterium smegmatis* and the spirochete *Treponema denticola* [13–16]. The genome of TIGR4, an invasive

serotype 4 pneumococcal human isolate encodes a putative iron-independent transcriptional regulator (IDTR) [17]. The present study was designed to evaluate the role of IDTR in the survival and pathogenesis of pneumococcus in different host environments. Since much of the pathology of pneumococcal infections is a consequence of host inflammatory responses we also examined the association between IDTR and host immune responses represented by a selected set of cytokines.

## Results

### Role of *idtr* in pneumococcal growth in vitro

The role of *idtr* in vitro in the presence or absence of free iron was examined. TIGR4 and  $\Delta idtr$  exhibited similar growth kinetics in chemically-defined medium (CDM) and iron-depleted CDM. The deletion mutant had a shorter lag phase than TIGR4 but both attained similar cell density at stationary phase. Also,  $\Delta idtr$  entered the exponential phase of growth slightly faster than TIGR4 in both CDM and iron-depleted CDM (Figure 1A). The microscopic appearance of  $\Delta idtr$  cells was strikingly different from TIGR4. The mutant formed aggregates and clusters as contrasted with short chains and diplococci of the parent wild-type TIGR4 (Figure 1B).

### Role of *idtr* in growth and survival in a mouse model of sepsis

The role of *idtr* in sepsis was evaluated using a mouse model. The  $\Delta idtr$  mutant was significantly attenuated in a mouse model of sepsis induced by either intranasal or intravenous infection (Figure 2A and B). Although there was a significant survival advantage in mice infected i.v. with  $\Delta idtr$  all mice eventually succumbed to infection. The kinetics of bacterial cell growth did not appear to vary greatly between TIGR4 and  $\Delta idtr$  following i.v. infection (Figure 3). However, loss of *idtr* markedly attenuates the ability of pneumococcus to invade and cause fatal bacteremia from the nasopharyngeal epithelial surface.

### Expression of selected virulence genes in vitro and in vivo

Expression of several well characterized and putative virulence genes in  $\Delta idtr$  and TIGR4 in vitro and in vivo was evaluated. Transcripts of *cps4A*, *pspA*, *ply*, hemolysin, and non-heme ferritin were up-regulated in  $\Delta idtr$  cells, while those of exfoliative toxin, iron ABC transporter and *pavA* remained essentially unchanged in vitro. Transcription of *nanB* was markedly repressed in the deletion mutant (Figure 4A).

The expression of these genes in vivo varied significantly at the three anatomical sites examined. During nasopharyngeal coloni-

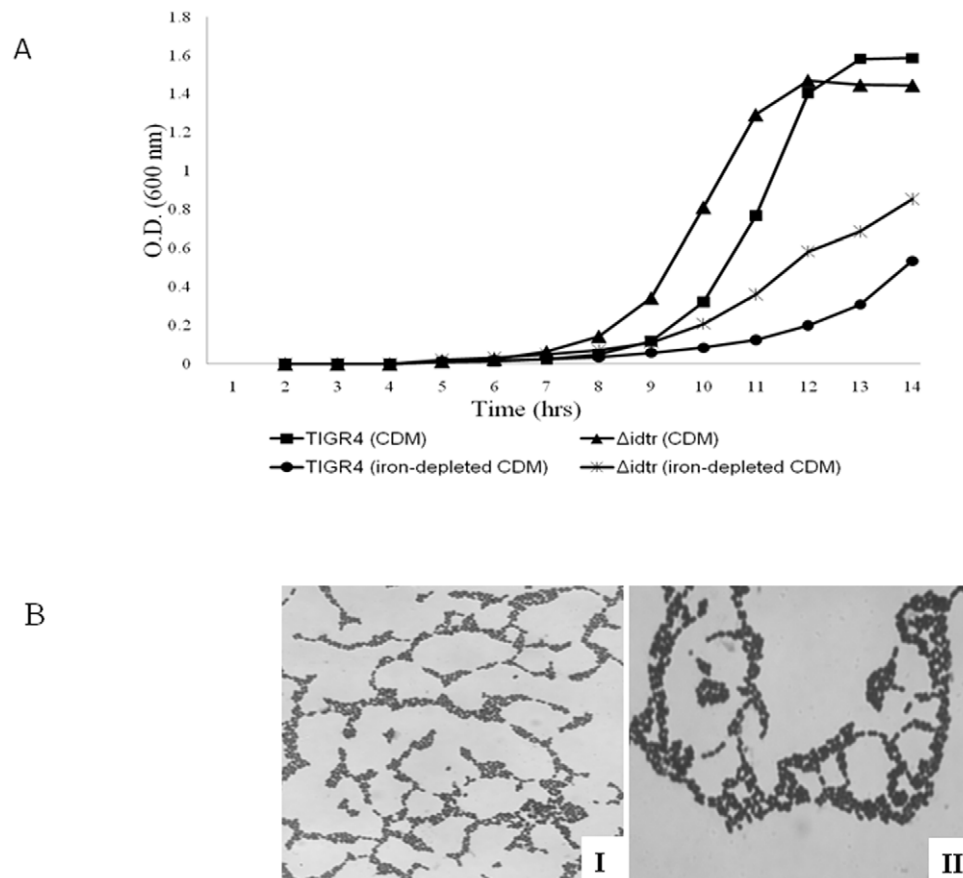

**Figure 1. Growth of TIGR4 and  $\Delta idtr$  and Gram stain morphology of  $\Delta idtr$  in vitro.** The growth of TIGR4 and  $\Delta idtr$  in CDM and iron depleted CDM was monitored by measuring absorbance at 600 nm. B) The morphology of  $\Delta idtr$  was observed in (I) Iron depleted CDM (II) CDM by Gram staining. The results shown are average of three independent experiments cells grown in iron. doi:10.1371/journal.pone.0055157.g001

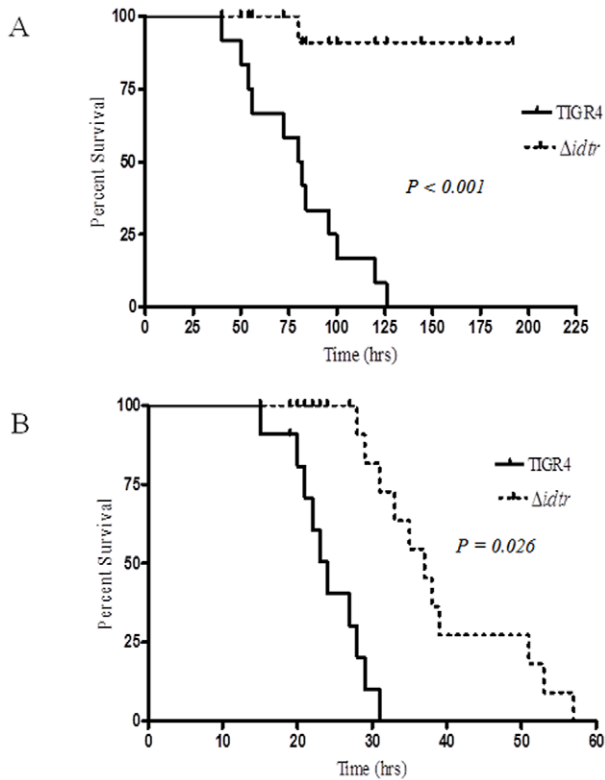

**Figure 2. Survival of mice infected with TIGR4 and  $\Delta idtr$ .** CBA/CaHN-Btk<sup>kid</sup>/J mice were inoculated (A) intranasally with 10<sup>6</sup> CFU and (B) intravenously with 10<sup>5</sup> CFU of TIGR4 and  $\Delta idtr$ . Kaplan Meier curves shown are a representative of triplicate experiments (n=5 in each experiment). doi:10.1371/journal.pone.0055157.g002

zation, the transcription of all ten genes was up-regulated in the mutant. During pneumonia transcription of the genes in the mutant was less than that during colonization but still higher when compared to that in TIGR4. During bacteremia transcription was unchanged or slightly repressed in the mutant as compared to TIGR4 cells (Figure 4B).

#### Affect of *idtr* on host cytokine response in intravenous sepsis model

Based on studies in humans and animal models, a panel of 14 cytokines (Table 1) were chosen [18–24] to evaluate the effect of *idtr* on the host innate immune response. At 48 hours after infection the concentration of all 14 cytokines that were tested was significantly decreased in the plasma samples of mice infected with  $\Delta idtr$  as compared to those challenged intravenously with TIGR4 (Table 1).

#### Discussion

The form and quantity of iron in humans varies significantly at different anatomical locations and it is likely that bacterial pathogens sense these differences, among other signals, and regulate gene expression in response. The exact mechanisms of iron acquisition and regulation in the pneumococcus are still largely unknown. However, the ability of this pathogen to colonize the highly iron-restricted environment of the nasopharynx and also cause invasive diseases in relatively iron-rich sites suggests that

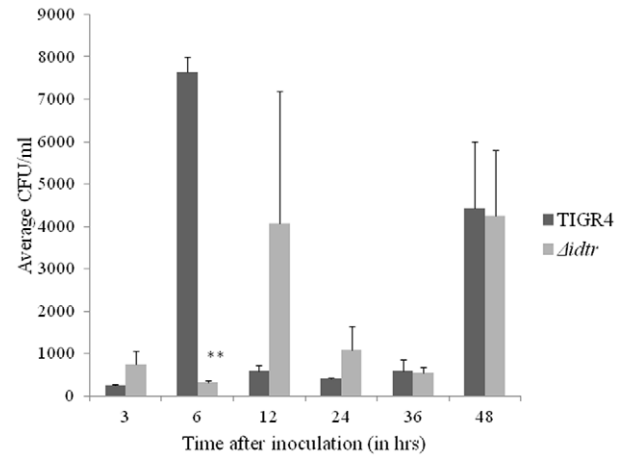

**Figure 3. Average bacterial counts from mouse blood TIGR4 and  $\Delta idtr$ .** A group of 5 mice each were infected intravenously with 10<sup>5</sup> CFU of TIGR4 or  $\Delta idtr$ . Blood samples at different time points were plated to determine bacterial counts. The error bars represent standard error of mean. \*\*Significantly decreased as compared to TIGR4 infected blood counts (P<0.01). doi:10.1371/journal.pone.0055157.g003

iron may be an important environmental signal for gene regulation.

A signature-tagged mutagenesis study in type 3 pneumococcus suggested a role for *smrB* (iron-dependent regulator) in pneumococcal virulence [25]. Although the authors proposed the gene designation *smrB*, we suggest the more associative *idtr* nomenclature. This gene was conserved in various unrelated pneumococcal strains and capsule types (data not shown).

We did not detect any significant difference in growth between wild-type and mutant either in presence or absence of iron in vitro. Additionally, no differences were observed between the mutant and wild-type in their ability to utilize a variety of iron sources (data not shown). The mutant forms clusters and aggregates in both the presence and absence of iron. These observations suggest that *idtr* has no significant role during pneumococcal growth in vitro but in some way affects bacterial cell-cell adhesion or daughter cell separation during cell division. TIGR4 and  $\Delta idtr$  did not differ significantly in growth rates in blood following bacteremia up to 48 hours after infection. In relatively iron-rich environments such as blood *idtr* is not critical for pneumococcal growth. This observation parallels that seen in vitro in which the mutant was able to replicate as well as wild-type in presence of high iron concentration.

The contribution of *idtr* to pneumococcal sepsis was evaluated using a mouse model and both intravenous and intranasal inoculation. The  $\Delta idtr$  mutant was significantly attenuated in the sepsis model by both routes of infection as compared to the parent strain but the more striking difference was observed with the intranasal route of infection. We postulate that *idtr* is essential specifically during transition from the nasopharyngeal mucosa to submucosal tissue and blood. The  $\Delta idtr$  mutant could be isolated from the nasopharynx two days after inoculation but not after day five, so lack of *idtr* may result in an even earlier deficiency, that is, an inability to efficiently colonize the nasopharynx. In either case it is likely that gene regulation by *idtr* is critical at mucosal surfaces where the concentration of extracellular iron in any form is exceedingly low.

Because increased mortality in mice infected with TIGR4 strain was not the result of more rapid cell growth in vivo, we selected ten

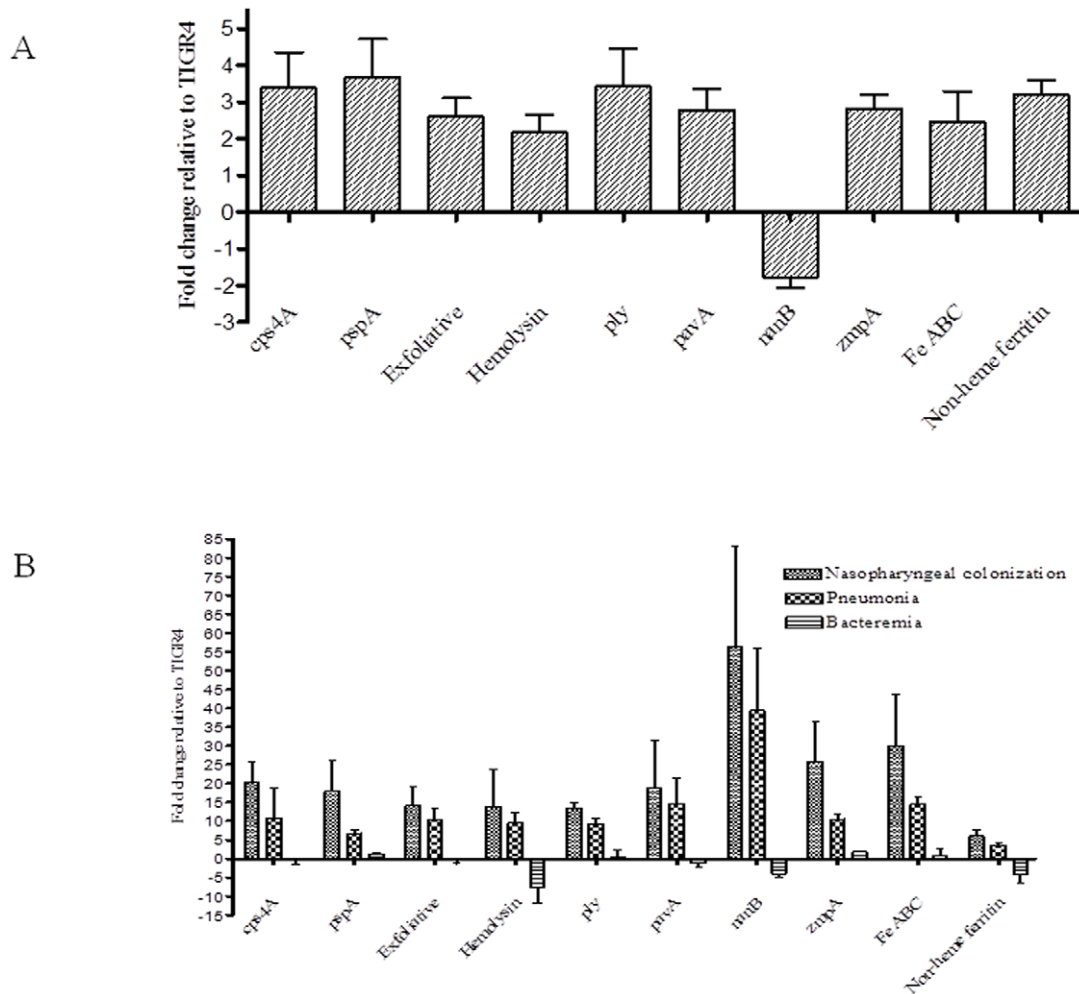

**Figure 4. Pneumococcal gene expression in  $\Delta idtr$  in vitro and in vivo.** Expression of ten pneumococcal genes in  $\Delta idtr$  relative to TIGR4 in CDM (A) and from nasopharyngeal washes, lung homogenates and blood samples (B) was quantified by RT-PCR. Each experiment was performed using three separate biological sample, each done in triplicate. doi:10.1371/journal.pone.0055157.g004

known and putative virulence genes which might potentially be directly or indirectly regulated by *idtr*. We had previously studied these same genes in TIGR4 and found that they are differentially regulated in different anatomic sites in mouse models [6]. The expression of the selected genes was not markedly different between wild-type and the mutant in vitro but pronounced differences were noted during growth in vivo. Gene expression in  $\Delta idtr$  was increased compared with wild-type in nasopharyngeal colonization and pneumonia, and was effectively unchanged during bacteremia for all genes except hemolysin. These results suggest that *idtr* does play a role in modulation of pneumococcal virulence. Based on these results we hypothesize that *idtr* contributes to repression of certain pneumococcal virulence-associated genes at mucosal surfaces and is de-repressed during bacteremia, possibly as a function of iron availability. An iron-dependent transcriptional regulator has been previously associated with virulence in a type 3 strain in pneumonia and bacteremia models by signature-tagged mutagenesis [25]. This study extends these findings to nasopharyngeal colonization and suggests that iron may be an important signal with effects on genes involved with virulence.

Sepsis results from systemic infection and the resultant systemic inflammatory responses [26]. The innate immune responses are critical inducers of sepsis syndrome in response to bacterial products and cellular components. Cytokines play a central role in regulation of the innate immune response and, therefore, in the manifestation of sepsis [27]. An exaggerated pro-inflammatory response which is the hall mark of sepsis is associated with high mortality both in humans and animal models. To uncover possible reasons for the improved survival of mice infected with  $\Delta idtr$  we evaluated the host cytokine response. The concentration of 14 cytokines known to play an important role in invasive pneumococcal disease was evaluated in plasma and was found to be significantly decreased in plasma samples obtained from mice infected with  $\Delta idtr$  as compared to TIGR4 infected mice. Most of the cytokines (Eotaxin, G-CSF, IFN- $\gamma$ , IL-1 $\beta$ , IL-17, MIP-2, KC, MIP-1 $\alpha$ , RANTES, TNF- $\alpha$ , IL-12, MCP-1) that were tested are pro-inflammatory cytokines except for IL-10 which is anti-inflammatory and IL-6 which has both pro [28] and anti-inflammatory effects [29]. Recent evidence indicates that both pro and anti-inflammatory responses are simultaneously regulated even in early stages of sepsis [30]. Increased levels of all the

**Table 1.** Average plasma cytokine/chemokine concentration in mice infected intravenously with TIGR4 or  $\Delta idtr$ .

| Cytokine/<br>Chemokine | TIGR4 (n = 5)<br>(mean $\pm$ SEM <sup>1</sup> ) | $\Delta idtr$ (n = 5)<br>(mean $\pm$ SEM) | P value |
|------------------------|-------------------------------------------------|-------------------------------------------|---------|
| Eotaxin                | 8279.40 $\pm$ 403.70                            | 3691.57 $\pm$ 224.38                      | <0.0001 |
| G-CSF                  | 9850.12 $\pm$ 0.0                               | 235.22 $\pm$ 8.83                         | <0.0001 |
| IFN- $\gamma$          | 14363.98 $\pm$ 396.73                           | 3.73 $\pm$ 1.50                           | <0.0001 |
| IL-1 $\beta$           | 201.93 $\pm$ 11.09                              | 17.67 $\pm$ 4.14                          | <0.0001 |
| IL-6                   | 16585.77 $\pm$ 361.72                           | 4.25 $\pm$ 0.65                           | <0.0001 |
| IL-10                  | 206.43 $\pm$ 5.14                               | 65.17 $\pm$ 6.47                          | <0.0001 |
| IL-17                  | 12.90 $\pm$ 0.42                                | 2.15 $\pm$ 0.34                           | <0.0001 |
| MIP-2                  | 2039.22 $\pm$ 64.19                             | 36.16 $\pm$ 0.0                           | <0.0001 |
| KC                     | 33583.04 $\pm$ 2178.31                          | 180.06 $\pm$ 11.59                        | <0.0001 |
| MIP-1 $\alpha$ (CCL3)  | 755.39 $\pm$ 15.66                              | 14.47 $\pm$ 3.44                          | <0.0001 |
| RANTES (CCL5)          | 840.20 $\pm$ 16.76                              | 39.05 $\pm$ 2.42                          | <0.0001 |
| TNF- $\alpha$          | 194.59 $\pm$ 4.02                               | 1.10 $\pm$ 0.20                           | <0.001  |
| IL-12p70               | 449.96 $\pm$ 17.79                              | 8.80 $\pm$ 0.99                           | <0.001  |
| MCP-1 (CCL2)           | 63856.85 $\pm$ 1601.45                          | 31.46 $\pm$ 6.63                          | <0.001  |

<sup>1</sup>Standard error of the mean.

doi:10.1371/journal.pone.0055157.t001

cytokines tested are associated with a poor prognosis in sepsis patients or animal models of sepsis [30–35]. Combined high levels of IL-10 and IL-6 are associated with a very high risk of death in sepsis patients [36].

This difference was not related to a faster growth rate and higher bacterial burden with TIGR4, as both wild-type and mutant were at the same approximate density in the blood at the time of cytokine sampling. These results imply that *idtr* not only modulates the bacterial virulence but also modulates the host response to pneumococcal infection. The mechanisms by which this modulation occurs remain to be determined. It is likely that *idtr* controls genes which encode pneumococcal surface-exposed components or other factors which interact with the host immune system. To our knowledge, this is the first report indicating a role of iron dependent transcription regulator in host immune response to pneumococcal infections. The role of iron-regulated bacterial genes in modulation of host responses has been reported for other Gram-positive pathogens. In *Staphylococcus aureus* the inactivation of *fur* is reported to be associated with increased nitric oxide sensitivity [37]. In *Mycobacterium smegmatis*, insertional inactivation of *ideR* (a homolog of *dtxR* and *idtr*) was shown to decrease production of manganese superoxide dismutase and catalase/peroxidase (*katG*), and increase susceptibility to killing by H<sub>2</sub>O<sub>2</sub> [38].

IDTR has an important role in virulence and gene expression and its function is likely related to the form and quantity of available iron at different anatomic sites of the host. Invasive disease in humans follows translocation of pneumococci from mucosal surfaces of the nasopharynx to the lower respiratory tract and, in some cases, dissemination via blood. Environmental conditions are markedly different at each location and the concentrations of certain nutrients necessary for pneumococcal growth almost certainly function, by various pathways, to regulate bacterial gene expression. Future work will define the role of IDTR on global protein expression both in vitro and within a host and undoubtedly expand our understanding the complete subset of genes which are controlled either directly or indirectly by

IDTR. Many of these gene products interact with host immune cells and contribute to pro-inflammatory cytokine responses and subsequent mortality in murine models. The identification of these bacterial gene products, and their specific interactions with the host immune system, will allow greater understanding of the pathogenesis of invasive pneumococcal infections and identify potential points at which intervention may be possible to reduce morbidity and mortality.

## Materials and Methods

### Bacterial strains and media

*S. pneumoniae* TIGR4, a capsular type 4 strain and an isogenic mutant deleted at *idtr* (described below) were used in all experiments. Bacteria from stocks stored at  $-80^{\circ}\text{C}$  were used to inoculate chemically-defined medium (CDM) (JRH Bioscience, Lenexa, KS) [39] supplemented with 0.1% choline, 0.25% sodium bicarbonate and 0.073% cysteine. Iron-depleted CDM was prepared by treatment with 3% w/v Chelex-100<sup>®</sup> (Bio-Rad, Hercules, CA) for 20 h. Chelex-treated CDM was supplemented with MnSO<sub>4</sub>, MgSO<sub>4</sub>, and CaCl<sub>2</sub> to a final concentration as that in CDM. All media were sterilized by filtration and stored at 4 $^{\circ}\text{C}$ . Todd Hewitt yeast extract medium (THY) used in transformation of TIGR4 was made by adding 0.2% glucose, 0.2% CaCl<sub>2</sub>, and 0.02% bovine serum albumin (BSA) to THY medium and adjusted to pH 7.2–7.4 [40]. The trimethoprim resistance gene *tmp* was isolated from *E. coli* cells containing the *pkoT* plasmid [41]. Trimethoprim (Tmp) was used at 50  $\mu\text{g}/\text{ml}$  to select for transformants.

### *idtr* mutant construction

An *idtr* mutant was constructed using PCR ligation mutagenesis as described by [42]. A schematic representation of the mutant construction is outlined in Figure 5. Briefly, *tmp* was amplified from *pkoT* plasmid DNA (primers T1 and T2) and the flanking regions of *idtr* were amplified from TIGR4 genomic DNA (primers I1 and I2, I3 and I4) described in table 2. The PCR amplified and purified I1-I2, I3-I4 and the *tmp*<sup>r</sup> cassette were subjected to single and double digestion by *HindIII* and *BamHI* respectively according to the manufacturer's protocol (Promega, Madison, WI). The digested PCR products were ligated using T4 DNA ligase (Promega, Madison, WI). The resulting construct (~2 kb) was amplified using primers I1-I4 and was used to transform TIGR4 as previously described [25]. The double recombination event was selected by plating on plates containing 50  $\mu\text{g}/\text{ml}$  of Tmp. Identification of Tmp-resistant mutants was confirmed by both PCR analysis and DNA sequencing.

### Animal models of pneumococcal infection

All animal studies were performed on either 10–12 wk old CBA/CaHN-Btk<sup>cid</sup>/J or C57BL/6 mice obtained from the Jackson Laboratory (Bar Harbor, ME) and bred in the VA animal facility. This study was carried out in strict accordance with the recommendations in the Guide for the Care and Use of Laboratory Animals of the National Institutes of Health. The protocol was approved by the Institutional Animal Care and Use Committee at the VA Medical Center (assurance number: A3101-1). For all in vivo studies pneumococcal strains were administered either intranasally (i.n.) or intravenously (i.v.) as noted. Following infection animals were observed every twelve hours for signs of piloerection, inability to eat or drink, or failure to withdraw from threatening stimuli. Animals were weighed daily and any animal which exhibited any aforementioned behavior, or lost more than 15% of pre-infection body weight, was euthanized. For intranasal

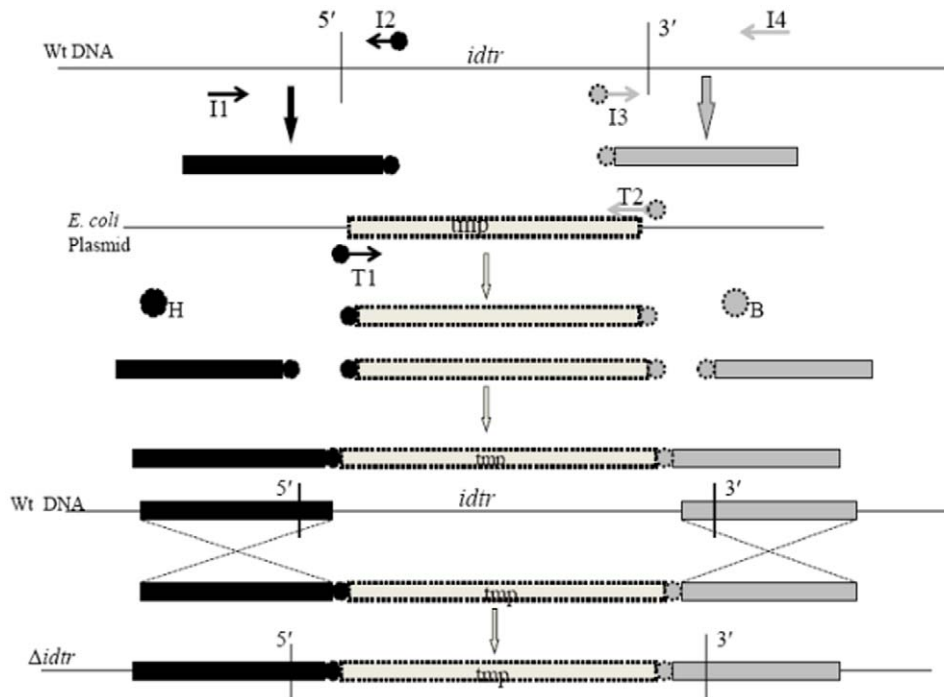

**Figure 5. Schematic representation of  $\Delta idtr$  construction.** H-HindIII, B-BamHI. T1, T2 amplify the *tnp* cassette (495 bp); T1 and T2 have H and B at 5' end. I1, I2 and I3, I4 amplify 5' and 3' end of *idtr*. I2 and I3 have H and B at 5' end. I1, I2 amplify a 945 bp product and I3, I4 amplify a product of 489 bp.

doi:10.1371/journal.pone.0055157.g005

infection, a suspension of mid-exponential phase TIGR4 or  $\Delta idtr$  ( $10^6$  CFU) in PBS was delivered into the nares of anesthetized mice (20  $\mu$ l per mouse) as previously described [43]. At this volume and cell number pneumococci remain localized to the nasopharynx. Intravenous inoculation was performed by injecting  $10^5$  CFU of TIGR4 or  $\Delta idtr$  in 100  $\mu$ l of PBS into the tail vein. Inocula for each experiment were confirmed by serial dilution and plate counting.

#### In vitro growth of TIGR4 and $\Delta idtr$

TIGR4 or  $\Delta idtr$  was inoculated into CDM and incubated at 37°C until cells reached mid-exponential phase growth (O.D<sub>600</sub> of 0.4–0.6). The cells were harvested by centrifugation, washed twice with sterile PBS and subcultured into CDM and iron-depleted CDM. Bacterial growth was monitored by measuring absorbance at 600 nm after brief vortexing and cell morphology was examined by Gram staining. Following all experiments terminal sub-cultures

were performed by plating on to blood agar plates (BAP) and testing for  $\alpha$ -hemolysis and optochin sensitivity to check the purity and identity of the cultures. Cultures of  $\Delta idtr$  were terminally sub-cultured on plates containing 50  $\mu$ g/ml Tmp.

#### In vivo growth of TIGR4 and $\Delta idtr$

Blood samples were collected by retro-orbital bleeding from mice inoculated intravenously with either TIGR4 or  $\Delta idtr$  at 3, 6, 12, 24, 36 and 48 h after infection. Bacterial density was determined by plating serially diluted blood samples on BAP and incubating 18–24 hrs at 37°C in 5% CO<sub>2</sub>.

#### In vitro and in vivo gene expression

The expression of ten characterized or putative pneumococcal genes associated with virulence was evaluated as described previously [6]. For in vitro experiments TIGR4 and  $\Delta idtr$  were grown in CDM at 37°C until mid-exponential phase. Nasopharyngeal washes and blood samples were obtained as previously described [43] and lung homogenates were collected as described [44]. Blood samples were collected at 48 hours for isolation of total RNA from bacteria and sera was collected for cytokine analysis. Animals inoculated with PBS were used as negative controls. RNA was isolated and gene expression was measured by quantitative RT-PCR as previously described [6]. Relative gene expression was analyzed using PFAFFL method [45] and fold changes were normalized to 16S rRNA.

#### Host cytokine response in sepsis

The concentrations of 14 cytokines and chemokines (eotaxin, G-CSF, IFN- $\gamma$ , IL-1 $\beta$ , IL-6, IL-10, 1L-17, MIP-2, KC, MIP-1 $\alpha$ , RANTES, TNF- $\alpha$ , IL-12p70, MCP-1) were analyzed in plasma

**Table 2. Primers used in mutagenesis.**

| Primers | Sequence (5'–3')                |
|---------|---------------------------------|
| I1      | TCAATCGTTACCACTTTTCAACCGATC     |
| I2      | NNAAGCTTAGATTTTCACTTTTCATTTCGTT |
| I3      | NNGGATCCAGTTTTGACATTCTCCATTATCT |
| I4      | CAACTCTTGCTGTTTCACTTTCA         |
| T1      | NNNNAAGCTTATGAAACCCGGAATCGGT    |
| T2      | NNNNGGATCTTAGCCGTTACGACGCG      |

doi:10.1371/journal.pone.0055157.t002

samples obtained from two groups of 5 mice each infected intravenously with TIGR4 or *Δidtr* as described above. The blood samples from which plasma was obtained were collected 48 hours after infection. Cytokine and chemokine concentrations were determined using Milliplex MAP Assay kits which are based on the Luminex xMAP technology (Millipore Corp., Billerica, MA) using standards and controls for each cytokine and chemokine provided by the manufacturer. All samples were evaluated in duplicates at two different dilutions.

## References

- AlonsoDeVelasco E, Verheul AF, Verhoef J, Snippe H (1995) *Streptococcus pneumoniae*: virulence factors, pathogenesis, and vaccines. *Microbiol Rev* 59: 591–603.
- Brown JS, Gilliland SM, Ruiz-Albert J, Holden DW (2002) Characterization of pit, a *Streptococcus pneumoniae* iron uptake ABC transporter. *Infect Immun* 70: 4389–4398.
- Brown JS, Gilliland SM, Holden DW (2001) A *Streptococcus pneumoniae* pathogenicity island encoding an ABC transporter involved in iron uptake and virulence. *Mol Microbiol* 40: 572–585.
- Brown JS, Ogunniyi AD, Woodrow MC, Holden DW, Paton JC (2001) Immunization with components of two iron uptake ABC transporters protects mice against systemic *Streptococcus pneumoniae* infection. *Infect Immun* 69: 6702–6706.
- Tai SS, Lee CJ, Winter RE (1993) Hemin utilization is related to virulence of *Streptococcus pneumoniae*. *Infect Immun* 61: 5401–5405.
- Gupta R, Shah P, Swiatlo E (2009) Differential gene expression in *Streptococcus pneumoniae* in response to various iron sources. *Microbial Pathogenesis* 47: 101–109.
- Escolar L, Pérez-Martín J, de Lorenzo V (1998) Binding of the Fur (ferric uptake regulator) repressor of *Escherichia coli* to arrays of the GATAAT sequence. *J Mol Biol* 283: 537–547.
- Staggs TM, Perry RD (1992) Fur regulation in *Yersinia* species. *Mol Microbiol* 6: 2507–2516.
- Goldberg MB, Boyko SA, Calderwood SB (1990) Transcriptional regulation by iron of a *Vibrio cholerae* virulence gene and homology of the gene to the *Escherichia coli* fur system. *J Bacteriol* 172: 6863–6870.
- Litwin CM, Calderwood SB (1993) Cloning and genetic analysis of the *Vibrio vulnificus* fur gene and construction of a fur mutant by in vivo marker exchange. *J Bacteriol* 175: 706–715.
- Prince RW, Cox CD, Vasil ML (1993) Coordinate regulation of siderophore and exotoxin A production: molecular cloning and sequencing of the *Pseudomonas aeruginosa* fur gene. *J Bacteriol* 175: 2589–2598.
- Thomas CE, Sparling PF (1994) Identification and cloning of a fur homologue from *Neisseria meningitidis*. *Mol Microbiol* 11: 725–737.
- Gunter-Seeboth K, Schupp T (1995) Cloning and sequence analysis of the *Corynebacterium diphtheriae* DtxR homologue from *Streptomyces lividans* and *S. pilosus* encoding a putative iron repressor protein. *Gene* 166: 117–119.
- Hill PJ, Cockayne A, Landers P, Morrissey JA, Sims CM, et al. (1998) *SirR*, a novel iron-dependent repressor in *Staphylococcus epidermidis*. *Infect Immun* 66: 4123–4129.
- Fiss EH, Yu S, Jacobs WR (1994) Identification of genes involved in the sequestration of iron in mycobacteria: the ferric exochelin biosynthetic and uptake pathways. *Mol Microbiol* 14: 557–569.
- Brett PJ, Burtnick MN, Fenno JC, Gherardini FC (2008) *Treponema denticola* TroR is a manganese- and iron-dependent transcriptional repressor. *Mol Microbiol* 70: 396–409.
- Tettelin H, Nelson KE, Paulsen IT, Eisen JA, Read TD, et al. (2001) Complete genome sequence of a virulent isolate of *Streptococcus pneumoniae*. *Science* 293: 498–506.
- Quin LR, Moore QC 3rd, Thornton JA, McDaniel LS (2008) Peritoneal challenge modulates expression of pneumococcal surface protein C during bacteremia in mice. *Infect Immun* 76: 1122–1127.
- Knapp S, Hareng L, Rijneveld AW, Bresser P, van der Zec JS, et al. (2004) Activation of neutrophils and inhibition of the proinflammatory cytokine response by endogenous granulocyte colony-stimulating factor in murine pneumococcal pneumonia. *J Infect Dis* 189: 1506–1515.
- Khan AQ, Shen Y, Wu ZQ, Wynn TA, Snapper CM (2002) Endogenous pro- and anti-inflammatory cytokines differentially regulate an in vivo humoral response to *Streptococcus pneumoniae*. *Infect Immun* 70: 749–761.
- Jones MR, Simms BT, Lupa MM, Kogan MS, Mizgerd JP (2005) Lung NF- $\kappa$ B activation and neutrophil recruitment require IL-1 and TNF receptor signaling during pneumococcal pneumonia. *J Immunol* 175: 7530–7535.
- Ferreira DM, Darrieux M, Silva DA, Leite LC, Ferreira JM Jr, et al. (2009) Characterization of protective mucosal and systemic immune responses elicited by pneumococcal surface protein PspA and PspC nasal vaccines against a respiratory pneumococcal challenge in mice. *Clin Vaccine Immunol* 16: 636–645.
- Draing C, Pfitzenmaier M, Zummo S, Mancuso G, Geyer A, et al. (2006) Comparison of lipoteichoic acid from different serotypes of *Streptococcus pneumoniae*. *J Biol Chem* 281: 33849–33859.
- Bernatoniene J, Zhang Q, Dogan S, Mitchell TJ, Paton JC, et al. (2008) Induction of CC and CXC chemokines in human antigen-presenting dendritic cells by the pneumococcal proteins pneumolysin and ChpA, and the role played by toll-like receptor 4, NF- $\kappa$ B, and mitogen-activated protein kinases. *J Infect Dis* 198: 1823–1833.
- Lau GW, Haataja S, Lonetto M, Kensit SE, Marra A, et al. (2001) A functional genomic analysis of type 3 *Streptococcus pneumoniae* virulence. *Mol Microbiol* 40: 555–571.
- Bone RC, Balk RA, Cerra FB, Dellinger RP, Fein AM, et al. (1992) Definitions for sepsis and organ failure and guidelines for the use of innovative therapies in sepsis. The ACCP/SCCM Consensus Conference Committee. American College of Chest Physicians/Society of Crit Care Med. *Chest* 101: 1644–1655.
- de Jong HK, van der Poll T, Wiersinga WJ (2010) The systemic pro-inflammatory response in sepsis. *J Innate Immun* 2: 422–430.
- Biffl WL, Moore EE, Moore FA, Barnett CC Jr. (1996) Interleukin-6 delays neutrophil apoptosis via a mechanism involving platelet-activating factor. *J Trauma* 40: 575–578.
- Tüg H, Trehu E, Atkins MB, Dinarello CA, Mier JW (1994) Interleukin-6 (IL-6) as an anti-inflammatory cytokine: induction of circulating IL-1 receptor antagonist and soluble tumor necrosis factor receptor p55. *Blood* 83: 113–118.
- Tamayo E, Fernandez A, Almansa R, Carrasco E, Heredia M, et al. (2011) Pro- and anti-inflammatory responses are regulated simultaneously from the first moments of septic shock. *Eur Cytokine Netw* 22: 82–87.
- Osuchowski MF, Welch K, Siddiqui J, Remick DG (2006) Circulating cytokine/inhibitor profiles reshape the understanding of the SIRS/CARS continuum in sepsis and predict mortality. *J Immunol* 177: 1967–1974.
- van der Poll T, de Waal Malefyt R, Coyle SM, Lowry SF (1997) Antiinflammatory cytokine responses during clinical sepsis and experimental endotoxemia: sequential measurements of plasma soluble interleukin (IL)-1 receptor type II, IL-10, and IL-13. *J Infect Dis* 175: 118–122.
- Wu HP, Shih CC, Lin CY, Hua CC, Chuang DY (2011) Serial increase of interleukin-12 response and HLA-DR expression in severe sepsis survivors. *Crit Care* 15: R224.
- Zhu S, Ashok M, Li J, Li W, Yang H, et al. (2009) Spermine protects mice against lethal sepsis partly by attenuating surrogate inflammatory markers. *Mol Med* 15: 275–282.
- Ness TL, Carpenter KJ, Ewing JL, Gerard CJ, Hogaboam CM, et al. (2004) CCR1 and CC chemokine ligand 5 interactions exacerbate innate immune responses during sepsis. *J Immunol* 173: 6938–6948.
- Kellum JA, Kong L, Fink MP, Weissfeld LA, Yealy DM, et al. (2007) Understanding the inflammatory cytokine response in pneumonia and sepsis: results of the Genetic and Inflammatory Markers of Sepsis (GenIMS) Study. *Arch Intern Med* 167: 1655–1663.
- Richardson AR, Dunman PM, Fang FC (2006) The nitrosative stress response of *Staphylococcus aureus* is required for resistance to innate immunity. *Mol Microbiol* 61: 927–939.
- Rodriguez GM, Voskuil MI, Gold B, Schoolnik GK, Smith I (2002) *ideR*, an essential gene in *Mycobacterium tuberculosis*: role of *ideR* in iron-dependent gene expression, iron metabolism, and oxidative stress response. *Infect Immun* 70: 3371–3381.
- van de Rijn I, Kessler RE (1980) Growth characteristics of group A streptococci in a new chemically defined medium. *Infect Immun* 27: 444–448.
- Pozzi G, Masala L, Iannelli F, Manganelli R, Havarstein L, et al. (1996) Competence for genetic transformation in encapsulated strains of *Streptococcus pneumoniae*: two allelic variants of the peptide pheromone. *J Bacteriol* 178: 6087–6090.
- Adrian PV, Thomson CJ, Klugman KP, Amyes SGB (2000) New gene cassettes for trimethoprim resistance, *dfi13*, and streptomycin-spectinomycin resistance, *aadA4*, inserted on a class 1 integron. *Antimicrob Agents Chemother* 44: 355–361.

42. Lau PCY, Sung CK, Lee JH, Morrison DA, Cvitkovitch DG (2002) PCR ligation mutagenesis in transformable streptococci: application and efficiency. *J Microbiol Methods* 49: 193–205.
43. Wu HY, Virolainen A, Mathews B, King J, Russell MW, et al. (1997) Establishment of a *Streptococcus pneumoniae* nasopharyngeal colonization model in adult mice. *Microb Pathog* 23: 127–137.
44. Ogunniyi AD, Giammarinaro P, Paton JC (2002) The genes encoding virulence-associated proteins and the capsule of *Streptococcus pneumoniae* are upregulated and differentially expressed in vivo. *Microbiology* 148: 2045–2053.
45. Pfaffl MW, Horgan GW, Dempfle L (2002) Relative expression software tool (REST(C)) for group-wise comparison and statistical analysis of relative expression results in real-time PCR. *Nucl Acids Res* 30: e36-.
